# Supplementary material for: Unveiling the Unexpected: Refractory Rickets as an Uncommon presentation of Tyrosinemia Type I
Source: Research Square preprint supplement (doi:10.21203/rs.3.rs-7155199/v1), 2025-08-22
Supplement: Supplementary file 1 [file adf35bcee5edd15a93ef527d.docx]

**CARE Checklist**

| **Item** | **Topic** | **Checklist item description** | **Line/page** |
| --- | --- | --- | --- |
| 1 | **Title** | The words “case report” should be in the title along with the area of focus | 1/1 |
| 2 | **Keywords** | Four to seven key words—include “case report” as one of the key words | 54/2 |
| 3a | **Abstract** | **Background:** What does this case report add to the medical literature? | 34/2 |
| 3b | **Case Presentation:** chief complaint, diagnoses, interventions, and outcomes | 42/2 |
| 3c | **Conclusion:** What is the main “take-away” message from this case? | 49/2 |
| 4 | **Introduction/background** | The current standard of care and contributions of this case—with references (1-2 paragraphs) | 57/2 |
| 5 | **Timeline** | Information from this case report organized into a timeline (table or figure) | ‘N/A’ |
| 6a | **Patient Information** | De-identified demographic and other patient or client specific information | 85/3 |
| 6b | Chief complaint—what prompted this visit? | 85/3 |
| 6c | Relevant history including past interventions and outcomes | 88/3 |
| 7 | **Physical Exam** | Relevant physical examination findings | 92/3 |
| 8a | **Diagnostic** | Evaluations such as surveys, laboratory testing, imaging, etc. | 96/3 |
| 8b | **Assessment** | Diagnostic reasoning including other diagnoses considered and challenges | 100/3 |
| 8c | Consider tables or figures linking assessment, diagnoses and interventions | 101/3 |
| 8d | Prognostic characteristics where applicable | 111/4 |
| 9a | **Interventions** | Types such as life-style recommendations, treatments, medications, surgery | 108/3 |
| 9b | Intervention administration such as dosage, frequency and duration | 109/3 |
| 9c | Note changes in intervention with explanation | 113/4 |
| 9d | Other concurrent interventions | 110/3 |
| 10a | **Follow-up and** | Clinician assessment (and patient or client assessed outcomes when appropriate) | 111/4 |
| 10b | **Outcomes** | Important follow-up diagnostic evaluations | 112/4 |
| 10c | Assessment of intervention adherence and tolerability, including adverse events | 111/4 |
| 11a | **Discussion** | Strengths and limitations in your approach to this case | 142/4 |
| 11b | Specify how this case report informs practice or Clinical Practice Guidelines (CPG) | 151/5 |
| 11c | How does this case report suggest a testable hypothesis? | ‘N/A’ |
| 11d | Conclusions and rationale | 153/5 |
| 12 | **Patient Perspective** | When appropriate include the assessment of the patient or client on this episode of care | ‘N/A’ |
| 13 | **Informed Consent** | Informed consent from the person who is the subject of this case report | 166/5 |
| 14 | **Additional Information** | Acknowledgement section; Competing Interests (Conflict of Interests statement); IRB approval, (Ethical Committee Approval) when required | 167/5 |
